# Supplementary material for: A Validated Prediction Model for Overall Survival From Stage III Non-Small Cell Lung Cancer: Toward Survival Prediction for Individual Patients
Source: PubMed Central journal article supplement — Int J Radiat Oncol Biol Phys. Author manuscript; Available in PMC 2016 Mar 10. (PMC4786012; doi:10.1016/j.ijrobp.2015.02.048), 2015-04-30
Supplement: NIHMS762733-supplement-Content_2.pdf [file NIHMS762733-supplement-Content_2.pdf]

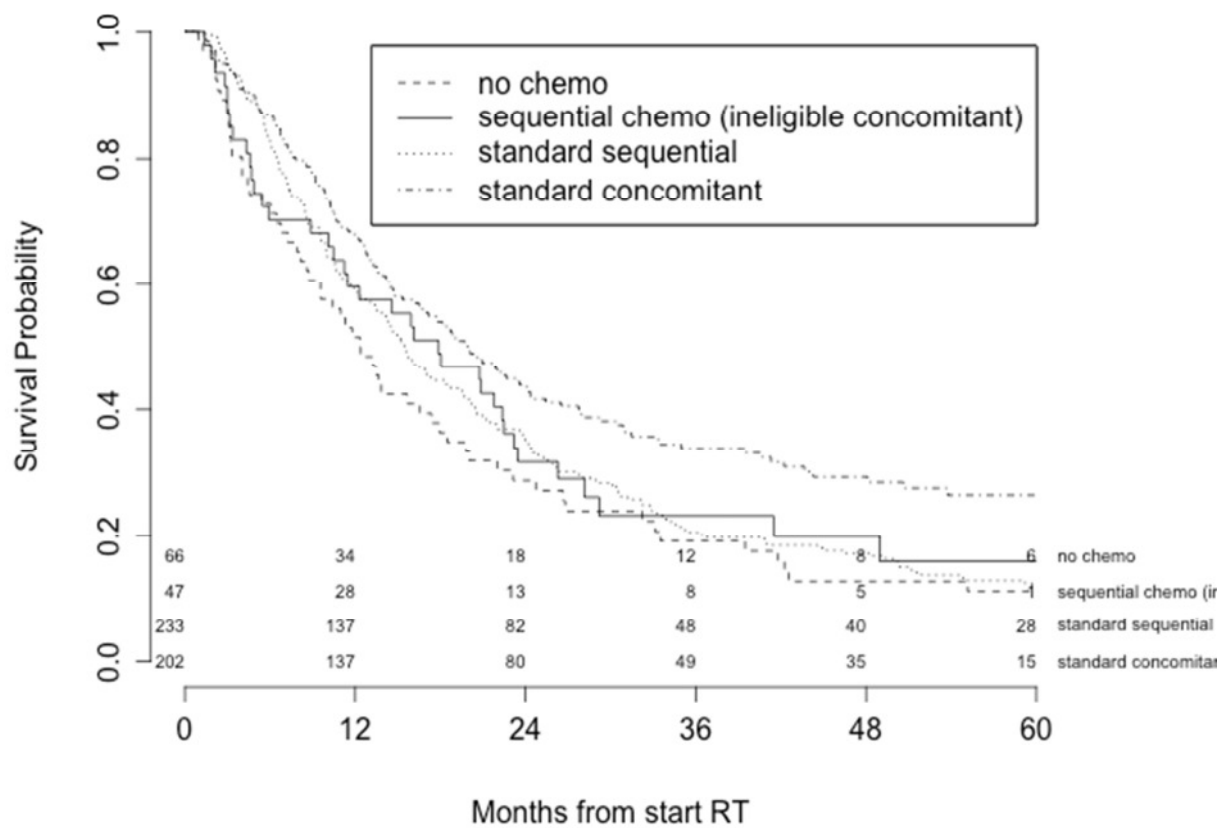

Supplemental Digital Content 2. Figure which shows the KM curves for the strata. The MAASTRO cohort was split into 4 groups.
