# Supplementary material for: A Validated Prediction Model for Overall Survival From Stage III Non-Small Cell Lung Cancer: Toward Survival Prediction for Individual Patients
Source: PubMed Central journal article supplement — Int J Radiat Oncol Biol Phys. Author manuscript; Available in PMC 2016 Mar 10. (PMC4786012; doi:10.1016/j.ijrobp.2015.02.048), 2015-04-30
Supplement: NIHMS762733-supplement-Content_4.pdf [file NIHMS762733-supplement-Content_4.pdf]

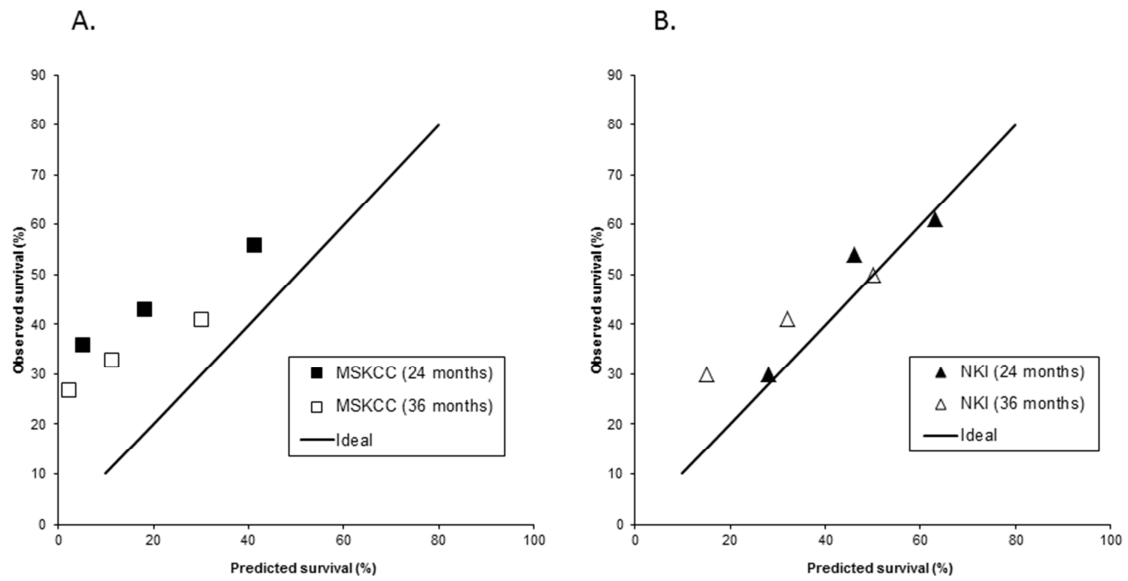

Supplemental Digital Content 4. Figure which shows the observed and predicted survival probability for both external validation cohorts. Calibration of the model on the external validation data from A) MSKCC and B) NKI. Patients are grouped according to risk. Observed versus predicted probability is shown for 24 and 36 months overall survival.
