# Supplementary material for: A Validated Prediction Model for Overall Survival From Stage III Non-Small Cell Lung Cancer: Toward Survival Prediction for Individual Patients
Source: PubMed Central journal article supplement — Int J Radiat Oncol Biol Phys. Author manuscript; Available in PMC 2016 Mar 10. (PMC4786012; doi:10.1016/j.ijrobp.2015.02.048), 2015-04-30
Supplement: NIHMS762733-supplement-Content_6.pdf [file NIHMS762733-supplement-Content_6.pdf]

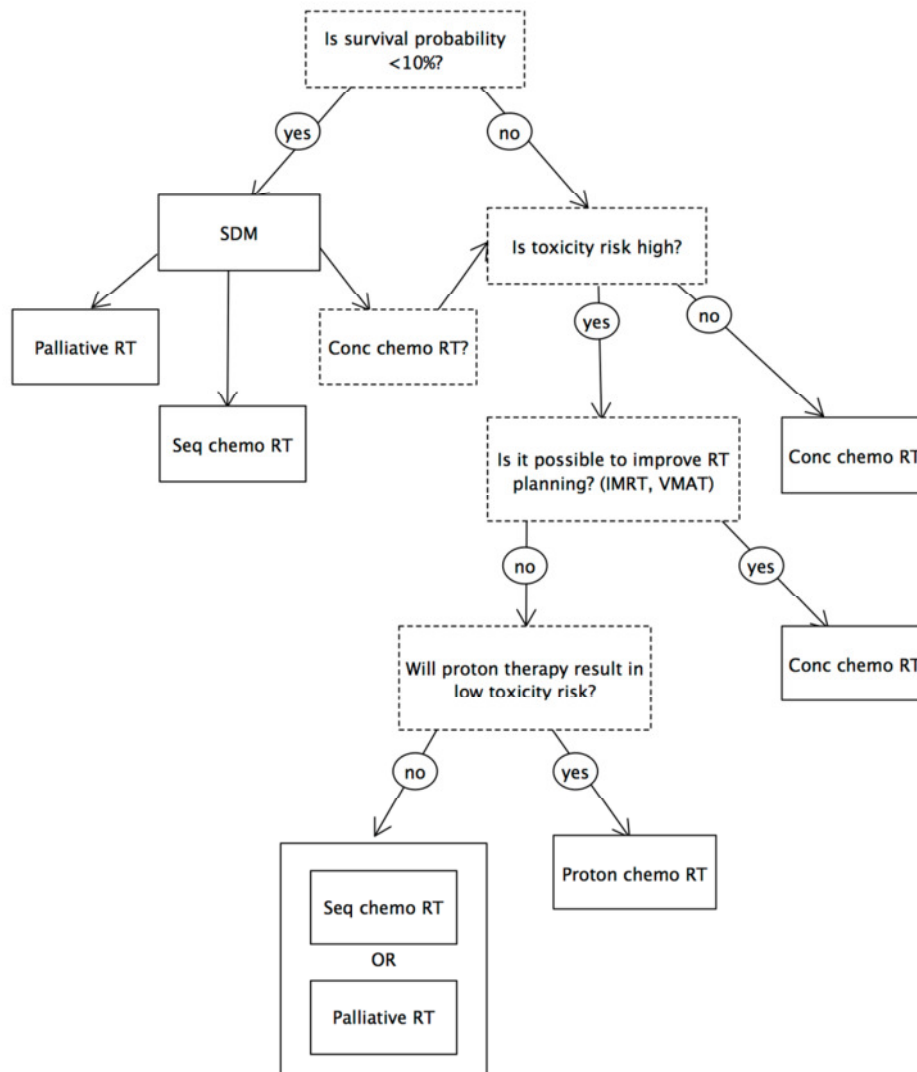

Supplemental Digital Content 1. Figure which shows a clinical application of a decision support system for stage III NSCLC patients that combines prediction models for survival and radiation-induced toxicity. Shared decision making (SDM), adaptation of treatment (improved radiotherapy planning) and choice of treatment options (either concomitant or sequential chemoradiotherapy and palliative radiotherapy) are integrated in a decision tree based on previously developed and validated prognostic models.
